# Supplementary material
Source: PubMed Central journal article supplement (PMC5019086)
Supplement: PulmCirc-006-329.s001.pdf [file PulmCirc-006-329.s001.pdf]

## **Appendix from Zamanian et al., “An observational study of inhaled-treprostinil respiratory-related safety in patients with pulmonary arterial hypertension” (Pulm. Circ., vol. 6, no. 3, p. 329)**

Table S1. Respiratory-related adverse events sorted within each category of interest

| Category                                                              | Events                                                                                                                                                                                                                                                                                                                                                                                                                                                                                                                                                                                                                                                                                                                                                                                                                                                                                                                                                                                                                             |
|-----------------------------------------------------------------------|------------------------------------------------------------------------------------------------------------------------------------------------------------------------------------------------------------------------------------------------------------------------------------------------------------------------------------------------------------------------------------------------------------------------------------------------------------------------------------------------------------------------------------------------------------------------------------------------------------------------------------------------------------------------------------------------------------------------------------------------------------------------------------------------------------------------------------------------------------------------------------------------------------------------------------------------------------------------------------------------------------------------------------|
| Evidence of bleeding from the upper or lower respiratory tract        | Arterial ligation, bloody airway discharge, epistaxis, gingival bleeding, hemoptysis, mouth hemorrhage, mucosal hemorrhage, respiratory tract hemorrhage, vascular rupture                                                                                                                                                                                                                                                                                                                                                                                                                                                                                                                                                                                                                                                                                                                                                                                                                                                         |
| Wheezing, bronchospasm, or exacerbation of preexisting asthma or COPD | Asthma, bronchial hyperreactivity, bronchospasm, COPD, emphysema, obstructive airways disorder, wheezing                                                                                                                                                                                                                                                                                                                                                                                                                                                                                                                                                                                                                                                                                                                                                                                                                                                                                                                           |
| Irritation or pain affecting the nose, mouth, larynx, or pharynx      | Cheilitis, dry mouth, dry throat, dysphagia, dysphonia, gingival pain, gingival swelling, glossitis, glossodynia, larynx irritation, mouth ulceration, nasal discomfort, nasal dryness, nasal ulcer, oral pain, oropharyngeal blistering, oropharyngeal pain, respiratory tract irritation, rhinalgia, stomatitis, swollen tongue, throat irritation, upper respiratory tract irritation                                                                                                                                                                                                                                                                                                                                                                                                                                                                                                                                                                                                                                           |
| Upper and/or lower respiratory tract infection                        | Acute sinusitis, bronchiectasis, bronchitis, bronchitis (viral), bronchopulmonary aspergillosis, candidiasis, chronic sinusitis, gingival infection, H1N1 influenza, influenza, influenza-like illness, laryngitis, lobar pneumonia, lower respiratory tract infection, lung infection, metapneumovirus infection, nasopharyngitis, oral candidiasis, oral fungal infection, parainfluenzae virus infection, pharyngitis, pharyngitis (streptococcal), pneumonia, pneumonia (aspiration), pneumonia (bacterial), pneumonia (hemophilus), pneumonia (primary atypical), pneumonia (respiratory syncytial viral), pneumonia (staphylococcal), pneumonia (streptococcal), pneumonia (viral), respiratory syncytial virus infection, respiratory tract infection, respiratory tract infection viral, rhinitis, rhinovirus infection, sepsis, sinusitis, tonsillitis, tooth infection, tooth abscess, tracheobronchitis, upper respiratory tract infection, viral infection, viral pharyngitis, viral upper respiratory tract infection |

Note: COPD: chronic obstructive pulmonary disease.
